# Supplementary material
Source: PubMed Central journal article supplement (PMC8420877)
Supplement: NIHMS1731785-supplement-Supplemental_Figures_and_Tables.pdf [file NIHMS1731785-supplement-Supplemental_Figures_and_Tables.pdf]

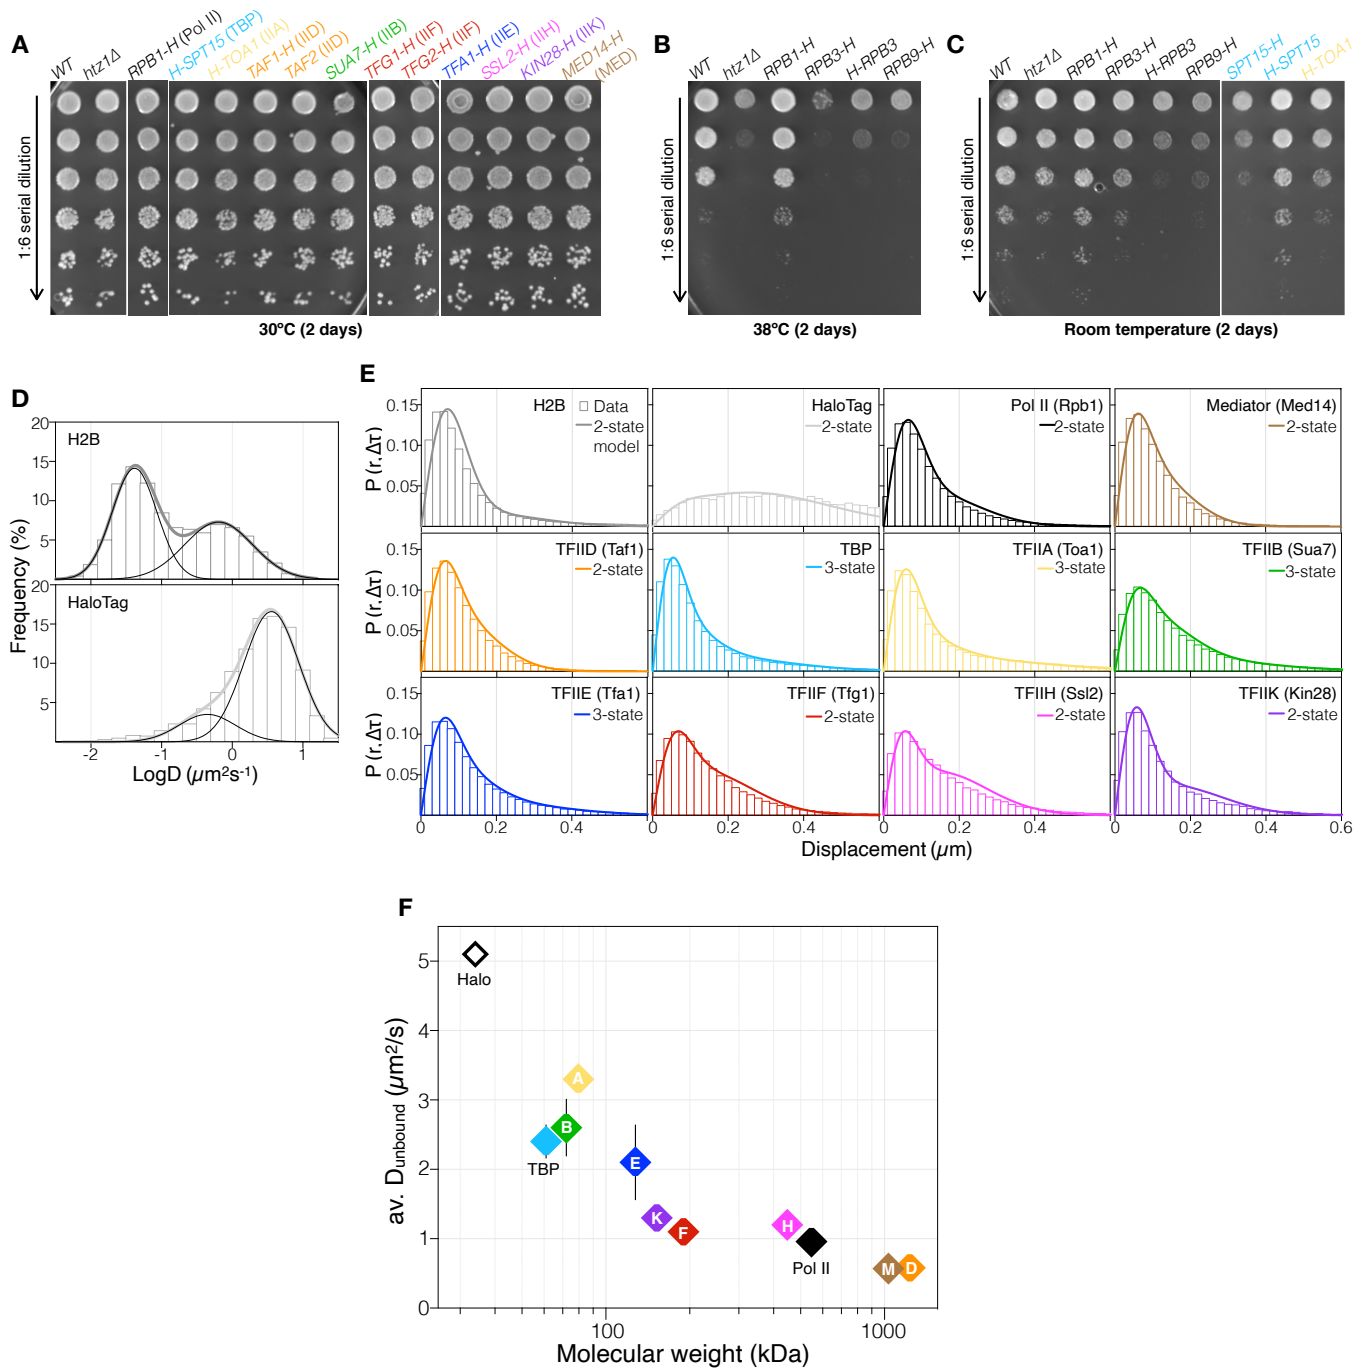

**Figure S1. Global diffusivities of individual PIC components, Related to Figure 1.**

(A) Growth phenotype assay at 30°C confirming functionality of HaloTag (H) fusions in individual yeast strains. *htz1Δ* strain serves as a control for growth defects under certain conditions. (B) and (C) C- and N-terminal H fusions of Rpb1 and TBP, respectively, exhibiting wildtype-level growth at 38° (B) or room temperature (C) compared to other genetic permutations. (D) LogD histograms (bars), two-Gaussian fits (thick curves) and subpopulations (thin black curves) of H2B (top) and free nuclear HaloTag (bottom). Histograms contain data from three (H2B) or two (HaloTag) biological replicates. (E) Displacement ( $\Delta t=10$  ms) distributions (bars) and corresponding two- or three-state kinetic models (lines). Modeling results are shown in Table S1. Histograms contain data from two (HaloTag) or three (others) biological replicates. (F) Correlation between  $D_{\text{free}}$  (from kinetic modeling) and theoretical molecular weight of each PIC component ( $\log_{10}$ ).  $D_{\text{free}}$  values, reported in Table S1, are means  $\pm$  SD from two (HaloTag) or three (others) biological replicates.

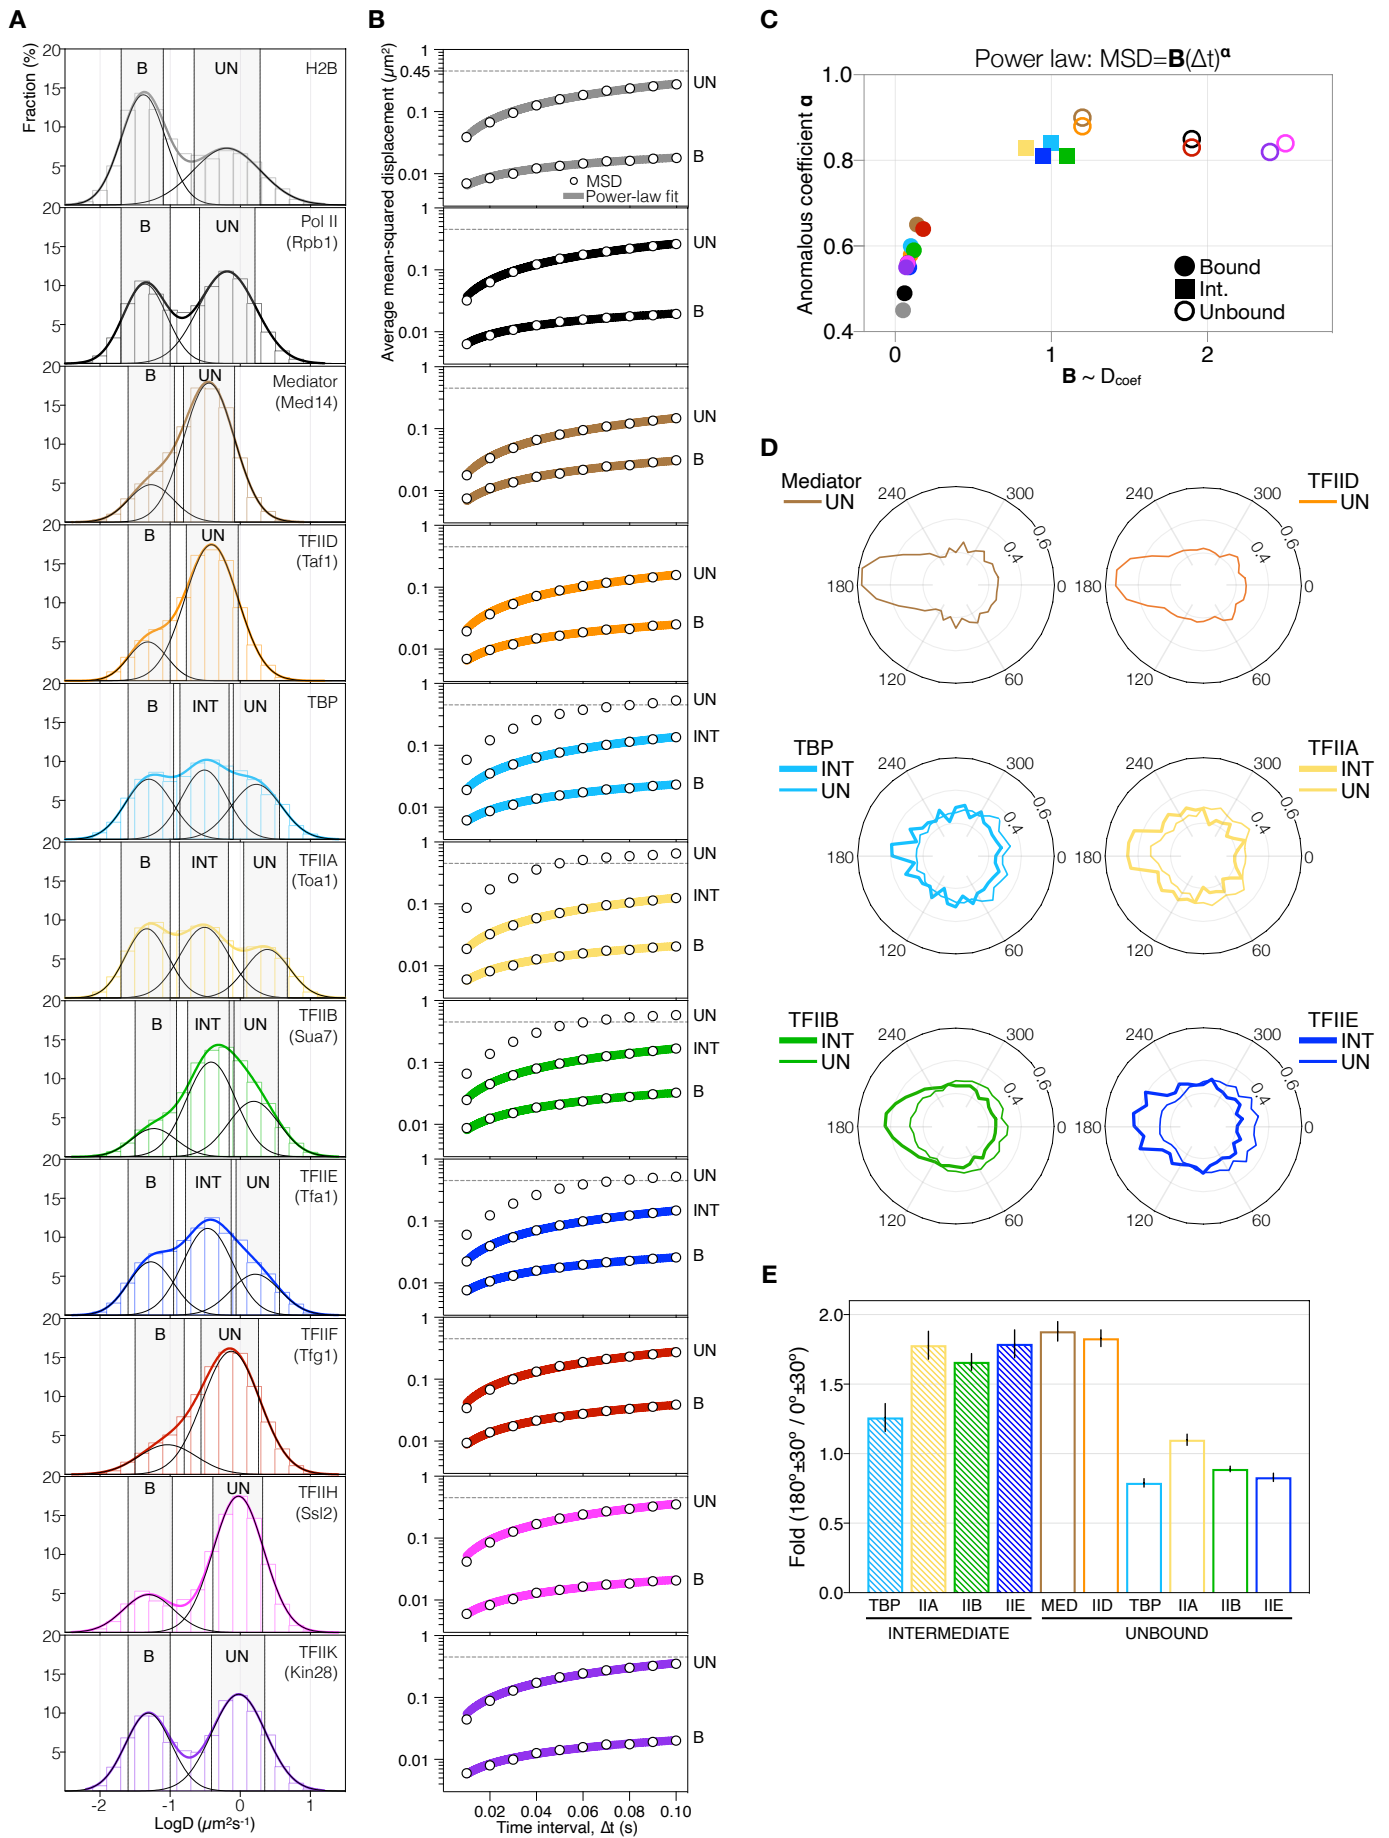

**Figure S2. Sub-classification of trajectories and mean-squared displacement (MSD) analysis of distinct dynamic behaviors, Related to Figure 1.**

(A) Fitted logD histograms as in Figure 1C. Trajectories exhibiting D values within mean  $\pm$  1 S.D. of respective subpopulation (shaded bars) were selected as a subclass for MSD analysis. B, chromatin-bound. UN, unbound. INT, intermediate. (B) Average MSD ( $\log_{10}$ ) computed for each subpopulation and corresponding power-law fit (solid line) of CB and INT. Average MSD plots of free diffusion plateau near the expected MSD  $\sim 0.45 \mu\text{m}^2$  (dashed line, see Methods) for such behavior in the haploid yeast nucleus ( $0.75 \mu\text{m}$  radius). (C) Power-law fit (equation indicated on top) results showing the anomalous coefficient  $\alpha$ , where  $\alpha < 1$  indicates a subdiffusive behavior, and the constant B, which is proportional to the average  $D_{\text{coef}}$ . (D) Angle analysis for unbound (UN) and intermediate (INT) populations of Mediator, TFIID, TBP, TFIIA, IIB and IIE. Normalized angle distributions were obtained using the vbSPT package (Hansen et al., 2020) (see Methods). (E) The probabilities of backward (large  $180^\circ \pm 30^\circ$  angles) relative to forward (small  $0^\circ \pm 30^\circ$  angles) movement, computed based on the angle distributions in (D) (see Methods).

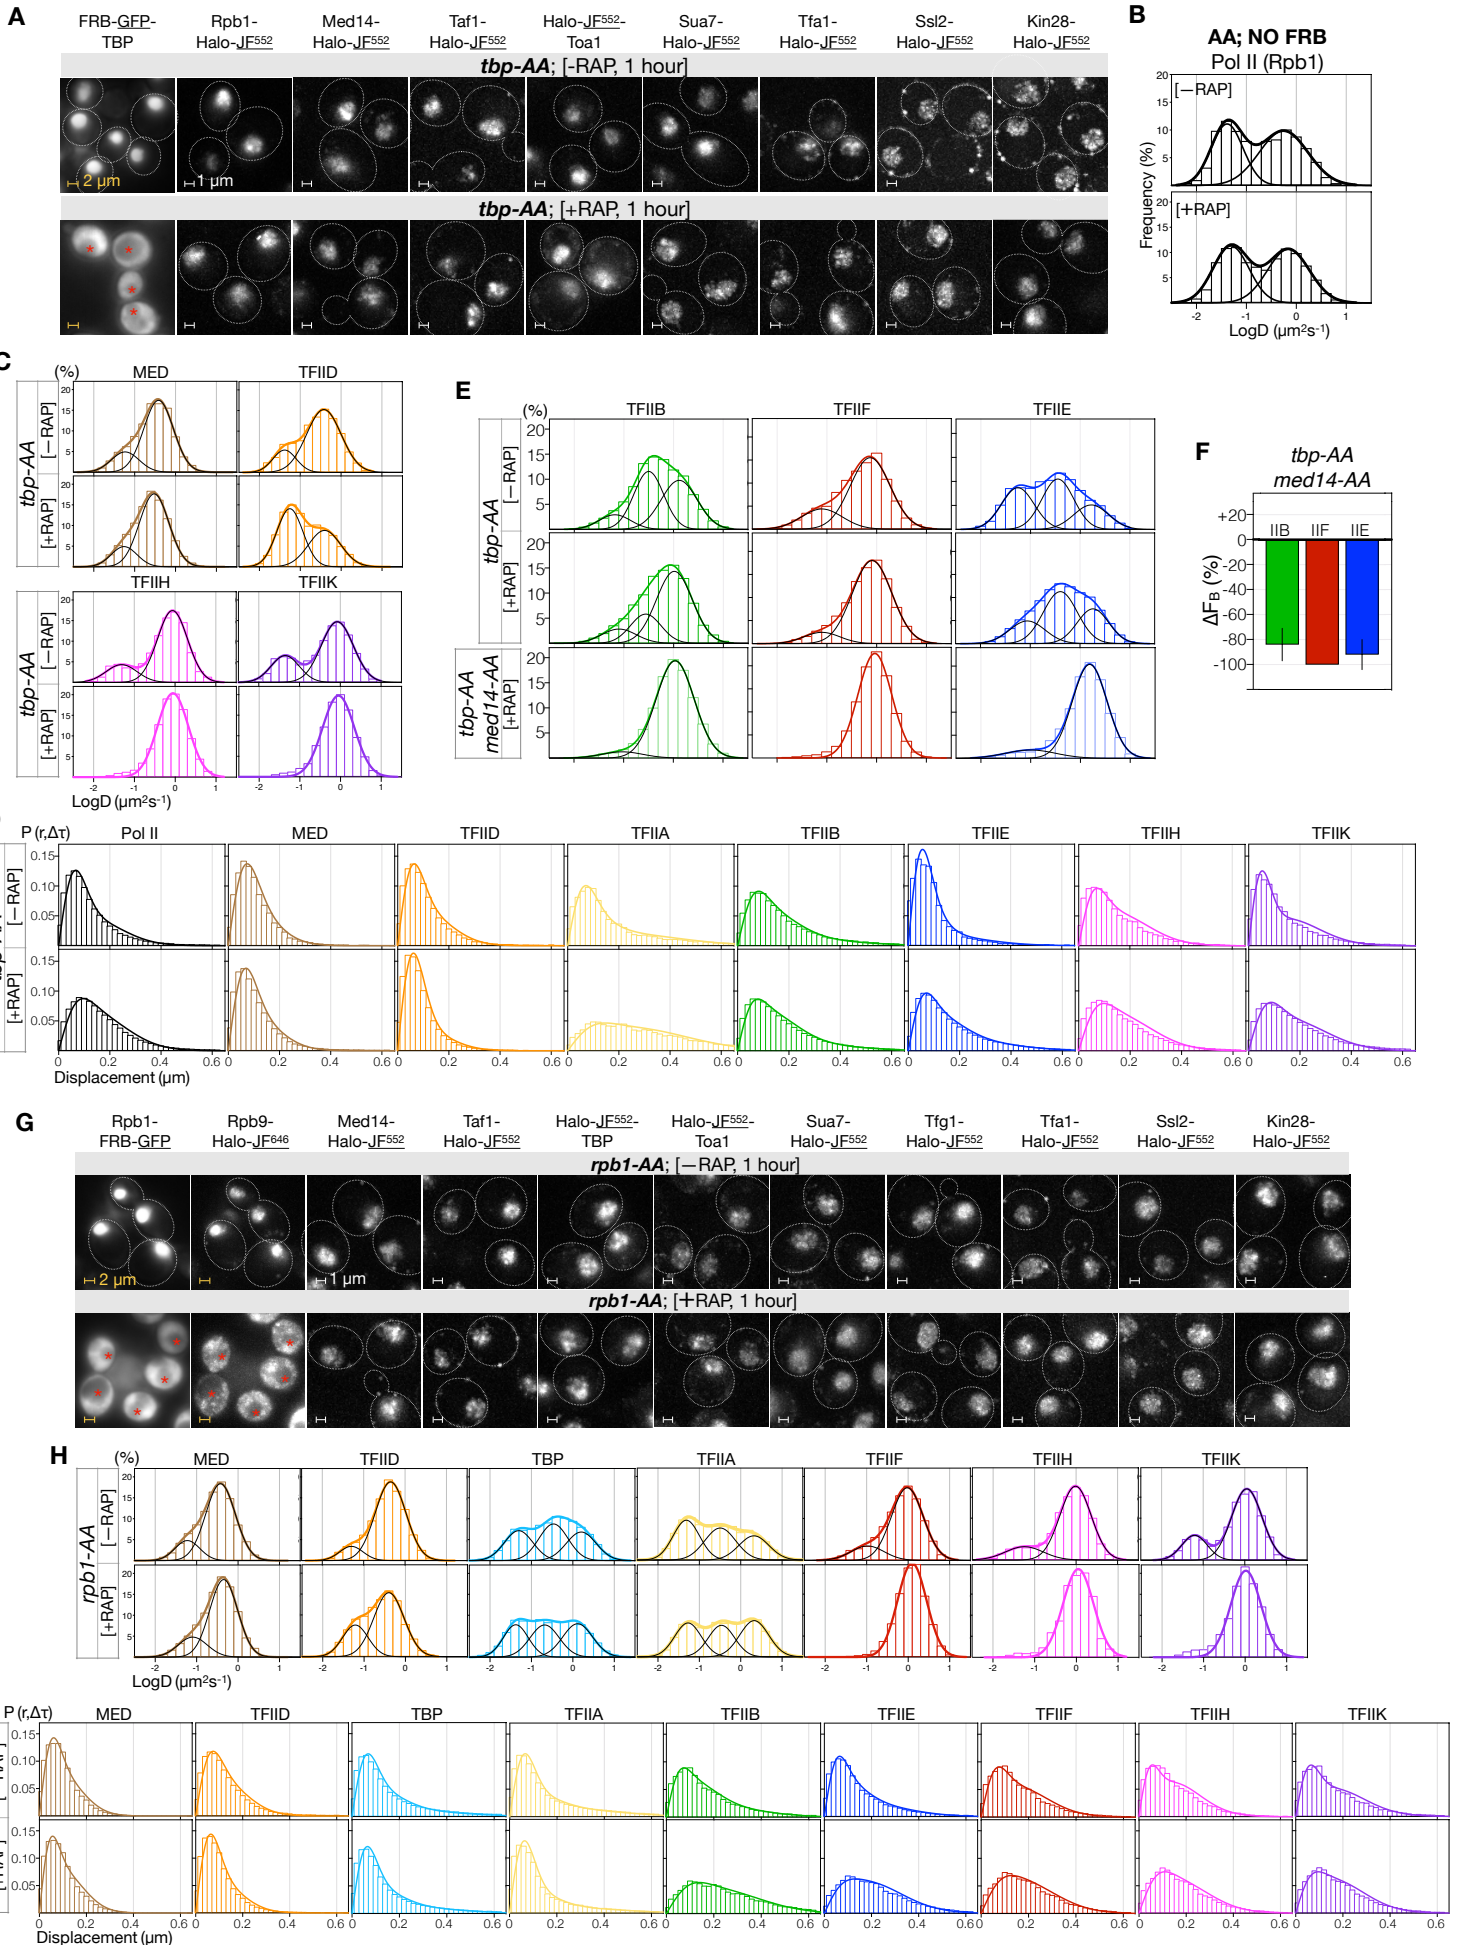

**Figure S3. Effect of TBP and Pol II depletion on dynamics of PIC components, Related to Figure 2.**

(A) Z-projection images showing GFP (TBP) and Halo-JF (others) fluorescence in *tbp-AA* cells before (-RAP, top) and after rapamycin addition (+RAP, bottom). Cell borders are indicated as dashed ovals. Growing cells were treated with DMSO (-RAP) or 1  $\mu\text{g}/\text{mL}$  rapamycin (+RAP) for 1 hour before imaging. Imaged fluorescence is underlined. \*, vacuole. Scale bar: 2  $\mu\text{m}$  (yellow) and 1  $\mu\text{m}$  (white). (B) LogD histograms of Rpb1-Halo in a control Anchor-Away (*AA*) strain harboring no FRB-tagged protein. Rapamycin treatment as described in (A) had little effect on global Pol II dynamics. (C) LogD histograms of PIC components in *tbp-AA* cells before (-RAP, top) and after (+RAP, bottom) Pol II depletion, shown as in Figure 2A. Cells were treated as described in (A) before fast tracking for  $\sim 2$  hours. Histograms contain data from one (-RAP) or two/three (+RAP) biological replicates. (D) Kinetic modeling for data in (C) and Figures 2A and 2C, shown as in Figure S1E. Results are reported in Table S2. (E) LogD histograms of TFIIB, IIF and IIE before (-RAP) and after (+RAP) TBP depletion (*tbp-AA*), as well as those obtained after simultaneous TBP/Med14 depletion (*tbp-AA; med14-AA*). Data are shown as in Figure 2C. (F)  $F_B$  changes relative to wildtype after double TBP/Med14 depletion, computed and shown as in Figure 2B. (G) Z-projection images of PIC components in *rpb1-AA* cells, shown as in (A). (H) LogD histograms of PIC components in *rpb1-AA* cells, shown as in (C). (I) Kinetic modeling of data in (B) and Figure 2E. Results are reported in Table S2.

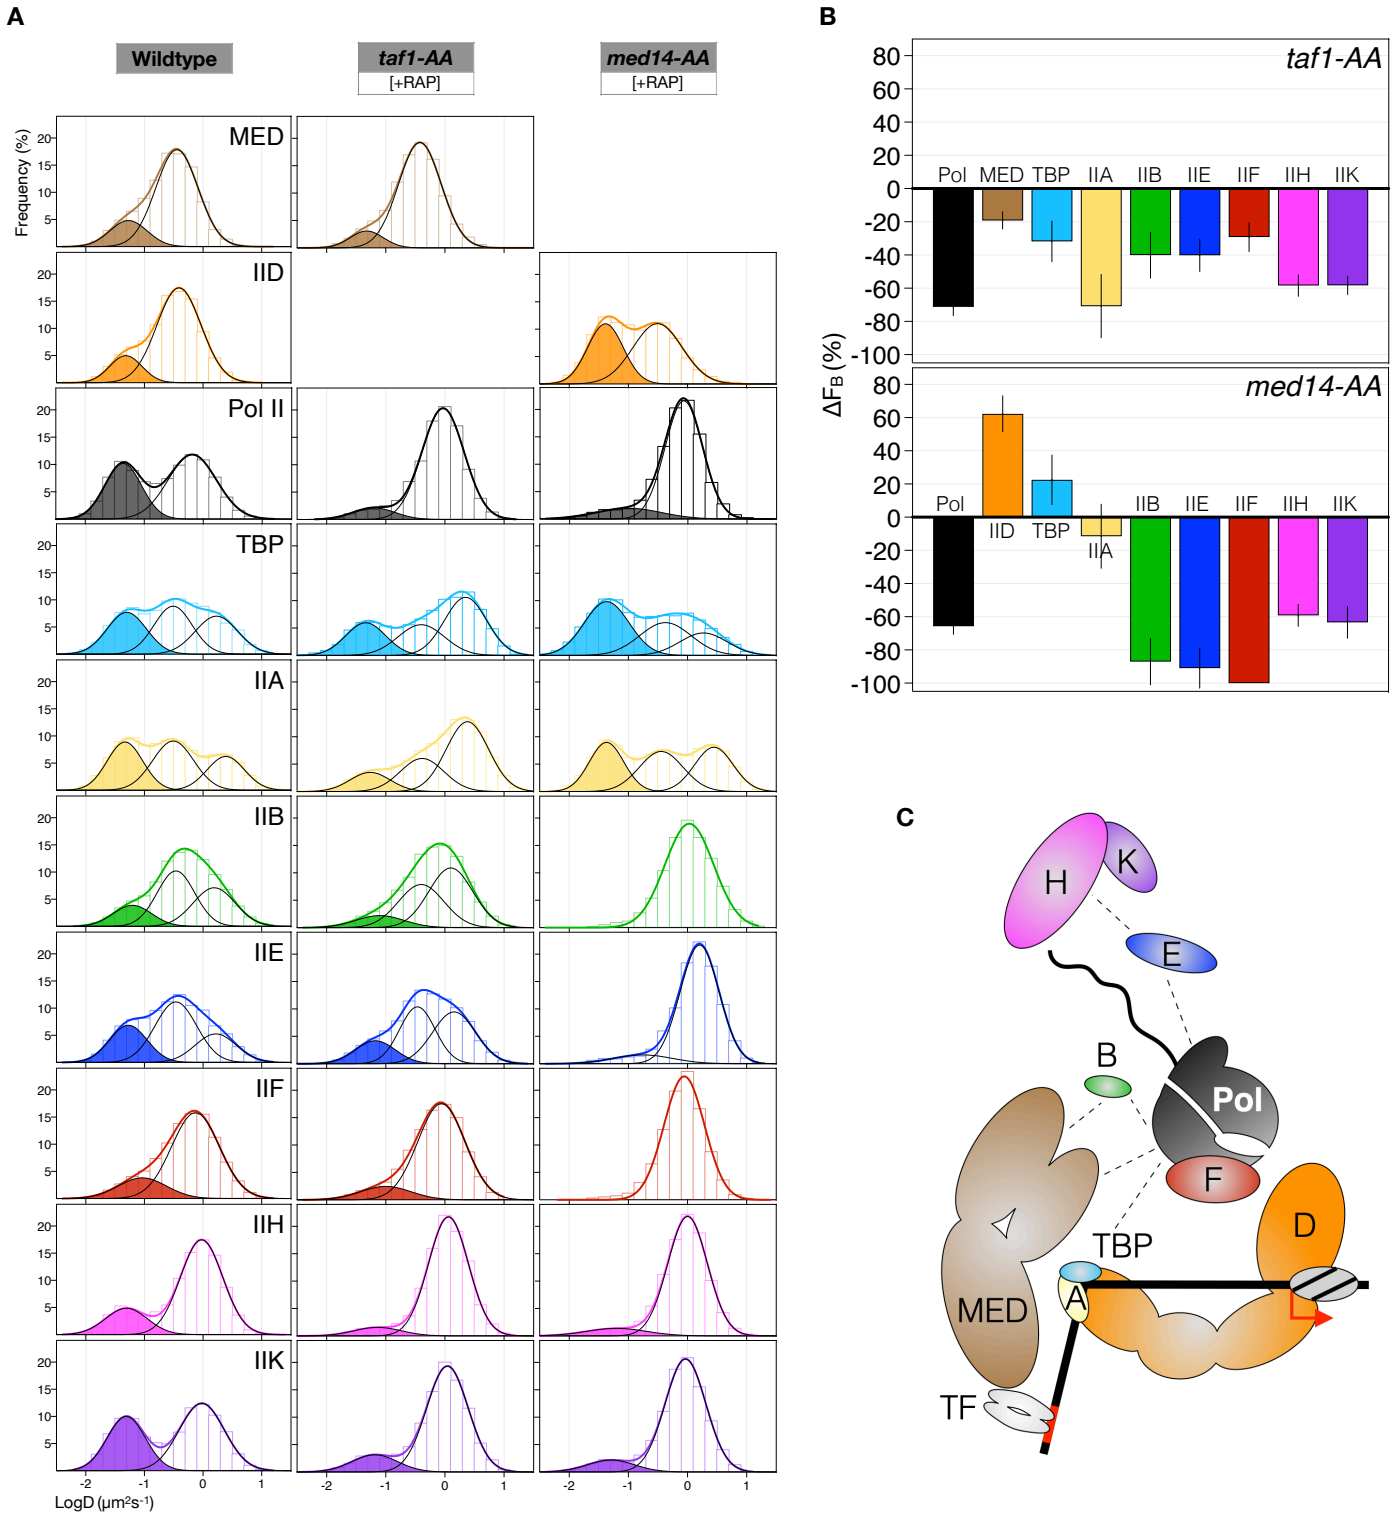

**Figure S4. Effect of Taf1 (TFIID) and Med14 (Mediator) depletion on dynamics of PIC components, Related to Figure 2.**

(A) LogD histograms of PIC components in wildtype and *taf1-AA* and *med14-AA* cells after 2 and 1 hour of rapamycin treatment, respectively. The chromatin-bound population, resolved through qualitative two- or three-Gaussian fitting, for each component is shaded. Histograms contain data from three (wildtype) or two (*AA*) biological replicates. (B) Changes in  $F_B$ , determined by kinetic fitting, relative to wildtype after double Taf1 (top) or Med14 (bottom) depletion, computed and shown as in Figure 2B. For *AA* samples, +DMSO control was obtained for one biological replicate each. Fitting results are reported in Table S2. (C) A model for hierarchical recruitment of PIC components to chromatin *in vivo*. Mediator, which may be recruited by a bound sequence-specific transcription factor (TF), and Pol II coordinate recruitment of TFIIB, IIE, IIF, IIH and IIK, comprising the enzymatic portion of the PIC. TFIID, TBP and TFIIA recognize and engage promoter elements and assist in recruitment of the enzymatic components. Pol II and TFIIF, as well as TFIIH and IIK, are depicted as subcomplexes prior to recruitment based on previous studies and similar diffusive behaviors observed in live cells (Figures 1F and S2C).

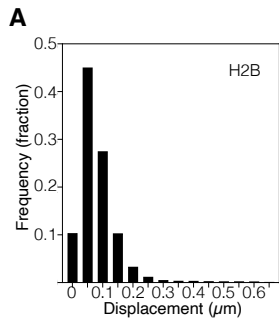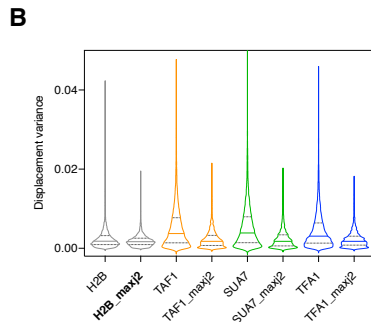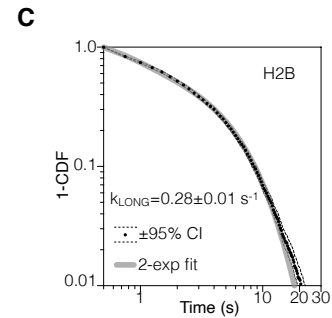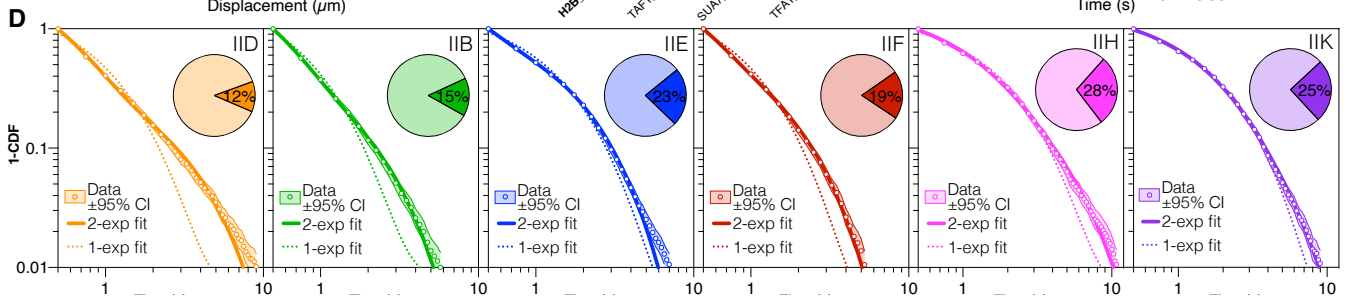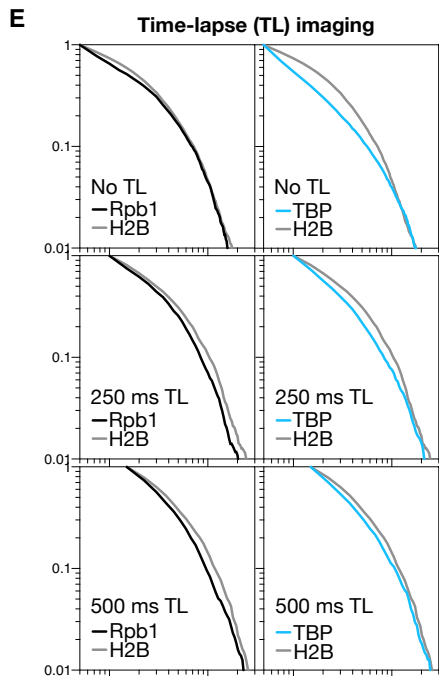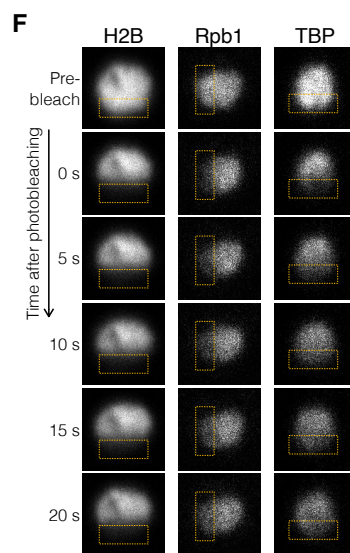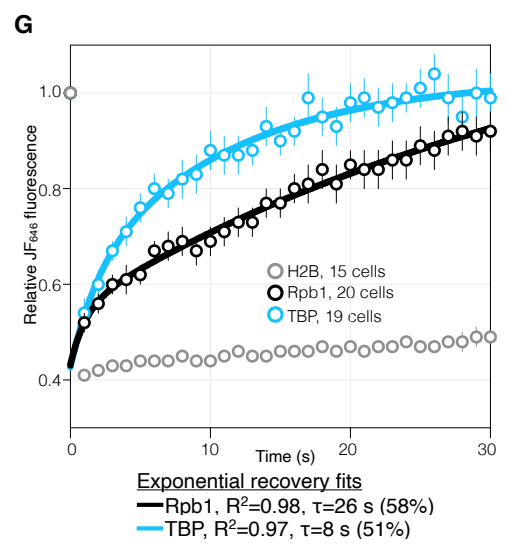

|                                 | No TL     |      |      | 250 ms TL |      |      | 500 ms TL |      |      |
|---------------------------------|-----------|------|------|-----------|------|------|-----------|------|------|
|                                 | H2B       | Rpb1 | TBP  | H2B       | Rpb1 | TBP  | H2B       | Rpb1 | TBP  |
| $k_{\text{sb}} (\text{s}^{-1})$ | 0.28      | 0.30 | 0.26 | 0.22      | 0.26 | 0.22 | 0.18      | 0.23 | 0.19 |
| Rpb1                            | 1 = 50    |      |      | 1 = 25    |      |      | 1 = 20    |      |      |
| $\tau_{\text{sb}} (\text{s})$   | 0.30-0.28 |      |      | 0.26-0.22 |      |      | 0.22-0.18 |      |      |

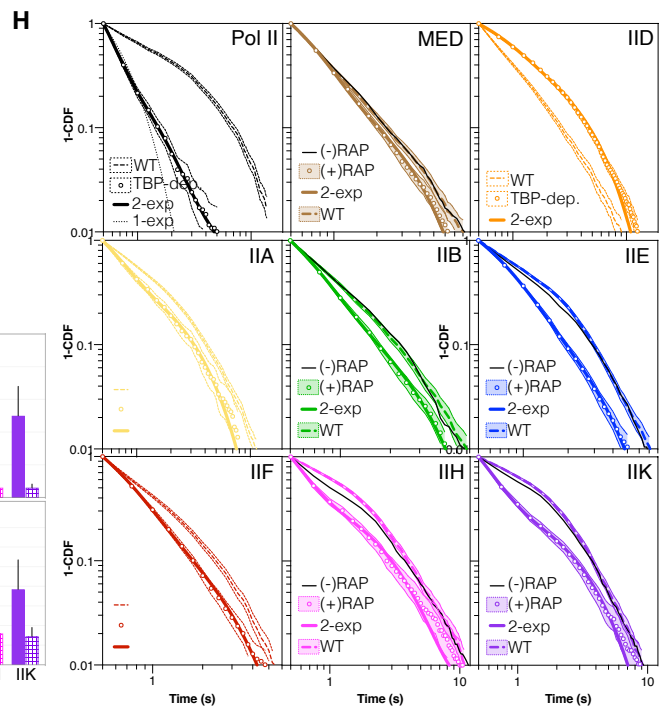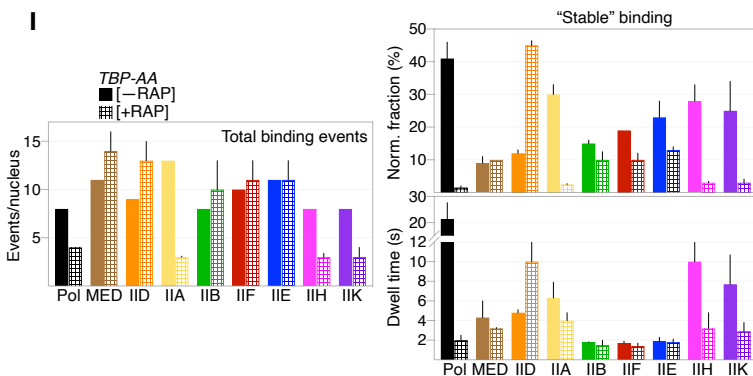

**Figure S5. Analyzing slow-tracking and FRAP data, Related to Figure 3.**

(A) Displacement distribution of H2B molecules ( $\Delta t=250$  ms) showing the motion of chromatin detected by slow tracking. The histogram indicates the predominance of short displacements rarely exceeding  $0.2\text{-}0.3\ \mu\text{m}$  ( $\sim 2\text{-}3$  pixels, 1 pixel = 107 nm). (B) Violin plots of variance among displacements by single molecules tracked using a two or three-pixel maximum jump cutoff (see Methods). Trajectories obtained using the two-pixel cutoff exhibit displacement variances similar to that of H2B. (C) Log-log 1-CDF curve for H2B, as in (a). The apparent dissociation constant for stable binding  $k_{sb}$  from double-exponential fit, used to correct  $k_{sb}$  values for PIC components, is indicated. Curve contains data from three biological replicates. (D) Log-log survival probability (1-CDF) (dots) computed from apparent dwell times of single-molecule binding events. Re-sampling by bootstrapping provided  $\pm 95\%$  confidence interval (CI) (dashed lines). Double-exponential fit (solid line) indicated fractions of stable ( $f_{sb}$ ) and transient binding (pie chart,  $f_{sb}$  shown) and respective apparent unbinding rates ( $k_{sb}$  and  $k_{tb}$ , Table 1). Curves contain data from three biological replicates. Fit results are reported in Table S1. (E) 1-CDF curves for H2B, Rpb1, and TBP acquired by time-lapse imaging (TL) featuring 250 ms exposure time alternating with 250 ms or 500 ms dark time. Results from double-exponential fitting are shown in bottom table. Similar corrected Rpb1  $\tau_{sb}$  were obtained from both TL regimes. However, TBP  $k_{sb}$  remained too close that that of H2B for correction. (F) Raw FRAP images of Halo-H2B, Rpb1-Halo, and Halo-TBP labeled with JF<sup>646</sup>, showing nuclear fluorescence before (pre-bleach) and up to 20 s after bleaching. The bleach areas are indicated (rectangles). (G) Quantitation of fluorescence recovery and corresponding fits for Rpb1 and TBP. Fit quality ( $R^2$ ) and slow-recovery  $\tau$  and fraction are indicated for each factor. Data are mean  $\pm$  s.e.m. from 15 (H2B), 19 (TBP) and 20 cells (Rpb1). The faster TBP recovery is unexpected in light of time-lapse SMT results in (E) and may reflect widely different TBP turnover rates *in vivo*. TBP is highly enriched at Pol I-transcribed genes, where its slow turnover kinetics (Grimaldi et al., 2014; Werven et al., 2009) might be preferentially captured by time-lapse SMT. Further FRAP experiments where the nucleolus, the center of Pol I transcription, is targeted for bleaching may address the discrepancy in these results. (H) Slow-tracking results for *tbp-AA* (-) and (+) RAP conditions. Comparing *tbp-AA* (-)RAP and WT curves indicates similar dissociation kinetics. Double-exponential fits are shown for (+) RAP curves and results reported in Table S2. Curves contain data from one (-RAP) or two/three (+RAP and WT) biological replicates and are shown with  $\pm 95\%$  CI as in (D). (I) Left: Total number of detected binding events (stable and transient) per imaged nucleus under (-) or (+)RAP condition (see Methods). Right: fraction of longer-dwell binding events, normalized for events/nucleus (see Methods) and corrected dwell times.



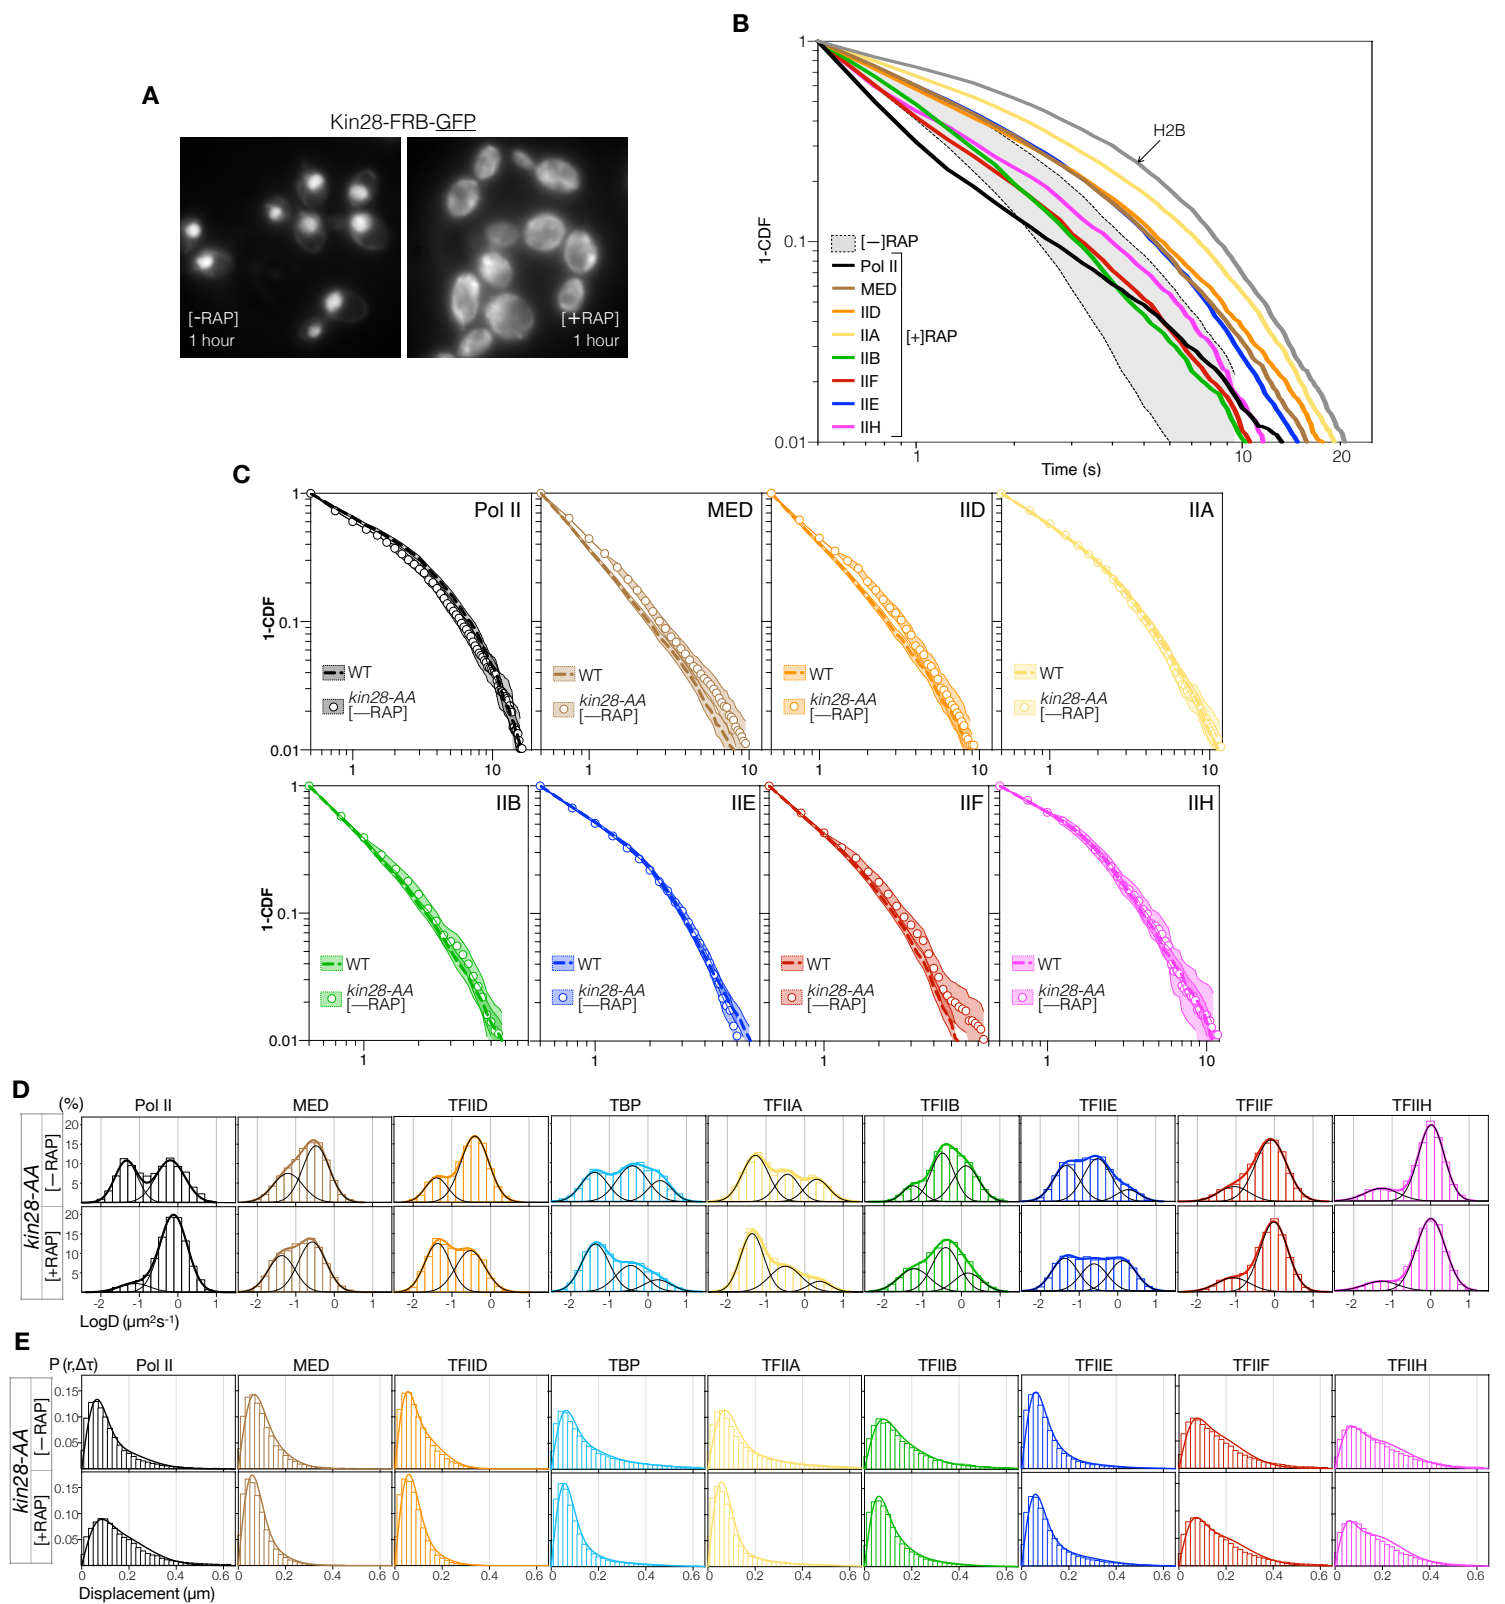

**Figure S6. Effect of Kin28 depletion on PIC dynamics, Related to Figure 4.**

(A) GFP fluorescence images of Kin28 in *kin28-AA* cells without (-RAP, left) and with (+RAP, right) 1  $\mu\text{g}/\text{mL}$  rapamycin for 1 hour. (B) Overlay of *kin28-AA* (+RAP) 1-CDF curves from Figure 4C showing extended chromatin residence of Mediator and all GTFs upon Kin28 depletion, compared to the normal range from WT (shaded region). The TFIIA curve approached the H2B limit, precluding reliable photobleaching correction. Thus, we did not quantify and report its dissociation kinetics under this condition. (C) Overlay of *kin28-AA* (-RAP) and WT 1-CDF curves for each PIC component showing similar dissociation kinetics. *kin28-AA* and WT data were obtained from one and three biological replicates, respectively. All curves are shown with  $\pm 95\%$  CI. (D) LogD histograms of PIC components in *kin28-AA* cells, shown as in Figure S3C. (E) Kinetic modeling of data in (D). Results are reported in Table S2.

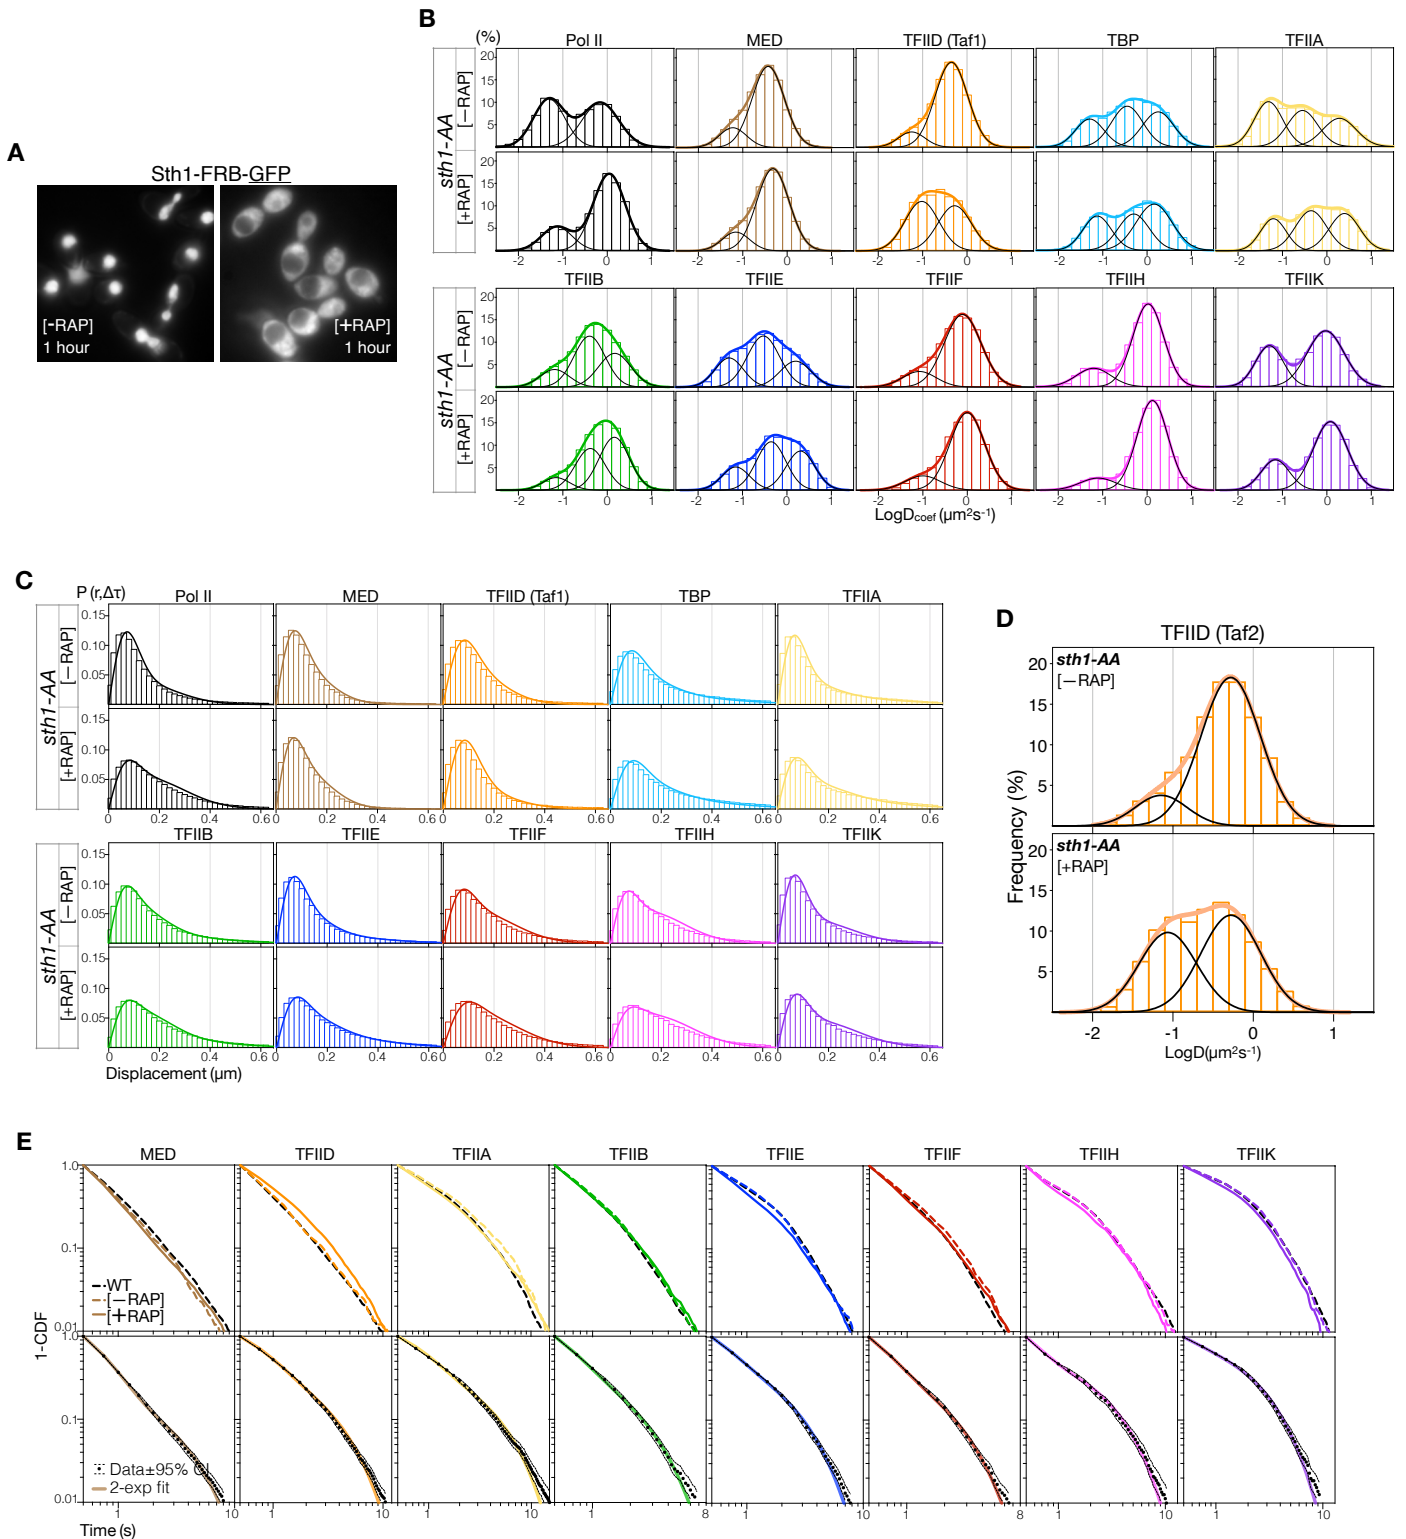

**Figure S7. Effect of RSC inactivation on PIC dynamics, Related to Figure 6.**

(A) GFP fluorescence images of Sth1 in *sth1-AA* cells without (-RAP, left) and with (+RAP, right) 1  $\mu\text{g}/\text{mL}$  rapamycin for 1 hour. (B) LogD histograms of PIC components in *sth1-AA* cells, shown as in Figure S3C. All histograms contain data from three biological replicates. (C) Kinetic modeling of data in (B). Results are reported in Table S2. (D) LogD histograms of Taf2 subunit of TFIID showing increased chromatin-bound fraction after RSC inactivation. (E) Top: 1-CDF curves for *sth1-AA* (-) and (+) RAP. Comparing *sth1-AA* (-RAP) and WT curves indicates little effect of the *sth1-AA* genetic background on dissociation kinetics of PIC components. Bottom: *sth1-AA* (+RAP) curves, shown with  $\pm 95\%$  CI, and corresponding double-exponential fits. Fit results are reported in Table S2. Data were obtained from one (-RAP) and three (+RAP and WT) biological replicates.

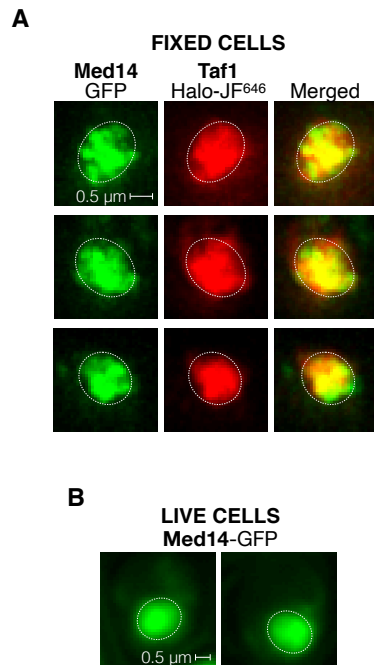

**Figure S8. Nuclear distributions of Mediator and TFIID, Related to Figure 7.**

(A) Two-color deconvolution microscopy images of Med14-GFP (left) and Taf1-Halo-JF<sup>646</sup> (middle) in three fixed cells showing non-homogenous nuclear distributions. Overlay images (right) show the degree of spatial overlap between prominent Mediator and TFIID foci in the same cells. The approximate nuclear periphery (dashed ovals), based on the overlay image, is indicated for each cell. (B) Med14-GFP images obtained from two live cells showing intense signals in subnuclear regions consistent in dimensions with fixed-cell images in (A).

| PIC comp. | HaloTag fusion | WILD-TYPE                            |                    |                                      |                    |                                      |                      |                     |                                    |                     |          | N <sub>trials</sub> | τ <sub>tree</sub> (s) | τ <sub>search</sub> (s) | SI (s) | Occupancy (%) |           |
|-----------|----------------|--------------------------------------|--------------------|--------------------------------------|--------------------|--------------------------------------|----------------------|---------------------|------------------------------------|---------------------|----------|---------------------|-----------------------|-------------------------|--------|---------------|-----------|
|           |                | Fast-tracking                        |                    |                                      |                    |                                      | Slow-tracking        |                     |                                    |                     |          |                     |                       |                         |        |               |           |
|           |                | Bound                                | Intermediate       | Unbound                              | # traj.            | k <sub>off</sub> (s <sup>-1</sup> )  | τ <sub>off</sub> (s) | f <sub>sb</sub> (%) | k <sub>on</sub> (s <sup>-1</sup> ) | τ <sub>on</sub> (s) | # events |                     |                       |                         |        |               |           |
|           |                | D (μm <sup>2</sup> s <sup>-1</sup> ) | F <sub>B</sub> (%) | D (μm <sup>2</sup> s <sup>-1</sup> ) | F <sub>I</sub> (%) | D (μm <sup>2</sup> s <sup>-1</sup> ) | F <sub>UN</sub> (%)  |                     |                                    |                     |          |                     |                       |                         |        |               |           |
|           | Halo-H2B       | 0.01±0.01                            | 69±3               | 0.37±0.03                            | 6±1                | 1.6±0.2                              | 31±3                 | 53,825***           | 0.28±0.01                          |                     |          |                     | 6,694***              |                         |        |               |           |
|           | Halo-NLS       |                                      |                    |                                      |                    | 5.1±0.1                              | 94±1                 | 14,823**            |                                    |                     |          |                     |                       |                         |        |               |           |
| Pol II    | Rpb1-Halo      | 0.05±0.00                            | 48±2               |                                      |                    | 1.0±0.1                              | 52±2                 | 50,963***           |                                    |                     |          |                     |                       |                         |        |               |           |
| Mediator  | Med14-Halo     | 0.06±0.01                            | 39±1               |                                      |                    | 0.6±0.0                              | 61±1                 | 12,725***           | 0.55±0.11                          | 3.7±1.5             | 9±3      | 3.2±0.5             | 0.3±0.1               | 5.811***                | 26±10  | 0.7±0.5       | 28.1±9.5  |
| TFIID     | Taf1-Halo      | 0.05±0.01                            | 39±3               |                                      |                    | 0.6±0.1                              | 61±3                 | 21,172***           | 0.49±0.01                          | 4.8±0.3             | 12±1     | 3.0±0.2             | 0.4±0.0               | 6,700***                | 22±2   | 0.9±0.2       | 28.2±3.6  |
| TBP       | Halo-Spt15     | 0.03±0.00                            | 34±4               | 0.35±0.05                            | 32±0               | 2.4±0.2                              | 34±4                 | 23,737***           |                                    |                     |          |                     |                       |                         |        |               |           |
| TFIIA     | Halo-Toal      | 0.03±0.01                            | 35±6               | 0.48±0.09                            | 25±2               | 3.3±0.1                              | 39±7                 | 43,507***           | 0.44±0.04                          | 6.3±1.6             | 30±3     | 2.2±0.2             | 0.5±0.1               | 10,125***               | 7±2    | 2.4±0.9       | 21.7±5.5  |
| TFIIB     | Sua7-Halo      | 0.05±0.01                            | 21±2               | 0.55±0.09                            | 44±1               | 2.6±0.4                              | 35±3                 | 39,191***           | 0.85±0.01                          | 1.8±0.0             | 15±1     | 3.6±0.1             | 0.3±0.0               | 4,499***                | 7±1    | 2.0±0.3       | 18.0±2.7  |
| TFIIE     | Tfal-Halo      | 0.04±0.01                            | 33±3               | 0.39±0.15                            | 36±6               | 2.1±0.5                              | 31±3                 | 22,235***           | 0.79±0.10                          | 2.0±0.4             | 26±5     | 5.5±1.3             | 0.2±0.0               | 8,030***                | 8±2    | 0.8±0.3       | 8.3±1.9   |
| TFIIF     | Tfg1-Halo      | 0.05±0.00                            | 25±2               |                                      |                    | 1.0±0.0                              | 75±2                 | 26,932***           | 0.87±0.07                          | 1.7±0.2             | 19±0     | 4.2±0.5             | 0.3±0.0               | 5,218***                | 6±1    | 1.4±0.2       | 11.4±1.5  |
| TFIIH     | Ssi2-Halo      | 0.06±0.01                            | 27±2               |                                      |                    | 1.2±0.1                              | 73±2                 | 21,134***           | 0.38±0.04                          | 10.0±4.1            | 28±5     | 1.2±0.1             | 1.1±0.1               | 4,162***                | 5±1    | 6.9±2.2       | 47.8±13.1 |
| TFIIK     | Kin28-Halo     | 0.04±0.00                            | 44±1               |                                      |                    | 1.3±0.0                              | 56±1                 | 9,917***            | 0.41±0.05                          | 7.7±3.0             | 25±9     | 1.0±0.1             | 1.4±0.2               | 5,276***                | 5±2    | 3.0±1.5       | 27.2±6.7  |

**Table S1. Fast- and slow-tracking results for PIC components in wildtype yeast. Related to Figures 1, S1E, 3 and 5.** Fit results from Spot-On kinetic modeling of displacements obtained by fast tracking. Average diffusion coefficients (D) and corresponding fractions of molecules (F) are indicated for distinct populations. Trajectories with at least 3 detections (# traj.) were accounted for in the kinetic model (Figure S1E). Data represent mean ± SD from two or three biological replicates (number of \*). For slow-tracking data, double-exponential fitting of the 1-CDF survival curves (Figures 3A, 3B and S4D) was performed to obtain the dissociation rate (k) and corresponding fraction (f) of stably-bound (sb) or transiently-bound (tb) molecules. The dwell times τ<sub>sb</sub> and τ<sub>tb</sub> resulted from correction using k<sub>sb</sub> for H2B (see Methods). The total number of binding events (transient and stable) from three biological replicates is indicated for each factor. Fast- and slow-tracking data allowed calculations of search kinetics and occupancy according to Figure 5 and STAR Methods.

|                 |            | Fast-tracking                      |           |                                    |           |                                    |              | Slow-tracking |                             |                 |              |                             |                 |          |
|-----------------|------------|------------------------------------|-----------|------------------------------------|-----------|------------------------------------|--------------|---------------|-----------------------------|-----------------|--------------|-----------------------------|-----------------|----------|
|                 |            | Bound                              |           | Intermediate                       |           | Unbound                            |              | # traj.       | $k_{sb}$ (s <sup>-1</sup> ) | $\tau_{sb}$ (s) | $f_{sb}$ (%) | $k_{tb}$ (s <sup>-1</sup> ) | $\tau_{tb}$ (s) | Event #  |
|                 |            | D ( $\mu\text{m}^2\text{s}^{-1}$ ) | $F_B$ (%) | D ( $\mu\text{m}^2\text{s}^{-1}$ ) | $F_I$ (%) | D ( $\mu\text{m}^2\text{s}^{-1}$ ) | $F_{UN}$ (%) |               |                             |                 |              |                             |                 |          |
| <i>tbp-AA</i>   |            |                                    |           |                                    |           |                                    |              |               |                             |                 |              |                             |                 |          |
| [- RAP]         |            |                                    |           |                                    |           |                                    |              |               |                             |                 |              |                             |                 |          |
| Pol II          | Rpb1-Halo  | 0.05                               | 45        |                                    |           | 0.9                                | 55           | 14,512*       |                             |                 |              |                             |                 |          |
| Mediator        | Med14-Halo | 0.04                               | 48        |                                    |           | 0.47                               | 52           | 4,387*        |                             |                 |              |                             |                 |          |
| TFIID           | Taf1-Halo  | 0.06                               | 44        |                                    |           | 0.65                               | 56           | 5,056*        |                             |                 |              |                             |                 |          |
| TFIIA           | Halo-Toa1  | 0.03                               | 32        | 0.48                               | 24        | 3.3                                | 44           | 10,171*       |                             |                 |              |                             |                 |          |
| TFIIB           | Sua7-Halo  | 0.05                               | 21        | 0.63                               | 50        | 2.9                                | 29           | 6,035*        |                             |                 |              |                             |                 |          |
| TFIIF           | Tfg1-Halo  | 0.05                               | 31        |                                    |           | 1.2                                | 69           | 3,744*        |                             |                 |              |                             |                 |          |
| TFIIE           | Tfal-Halo  | 0.03                               | 45        | 0.22                               | 30        | 1.6                                | 25           | 2,694*        |                             |                 |              |                             |                 |          |
| TFIIH           | Ssl2-Halo  | 0.06                               | 26        |                                    |           | 1.1                                | 74           | 5,782*        |                             |                 |              |                             |                 |          |
| TFIIK           | Kin28-Halo | 0.07                               | 35        |                                    |           | 1.2                                | 65           | 7,212*        |                             |                 |              |                             |                 |          |
| [+ RAP]         |            |                                    |           |                                    |           |                                    |              |               |                             |                 |              |                             |                 |          |
| Pol II          | Rpb1-Halo  |                                    |           | 0.23±0.06                          | 21±2      | 1.1±0.1                            | 79±2         | 46,130***     | 0.78±0.12                   | 2.0±0.5         | 3±1          | 5.1±0.1                     | 0.2±0.0         | 554*     |
| Mediator        | Med14-Halo | 0.05±0.00                          | 47±1      |                                    |           | 0.56±0.02                          | 53±1         | 22,869***     | 0.59±0.01                   | 3.2±0.1         | 8±0          | 3.1±0.2                     | 0.4±0.0         | 5,310*** |
| TFIID           | Taf1-Halo  | 0.04±0.01                          | 66±2      |                                    |           | 0.61±0.14                          | 34±2         | 22,825***     | 0.38±0.04                   | 10.0±4.1        | 31±1         | 1.9±0.2                     | 0.6±0.1         | 5,807*** |
| TFIIA           | Halo-Toa1  |                                    |           | 0.36±0.09                          | 13±0      | 3.6±0.2                            | 87±0         | 34,469***     | 0.53±0.05                   | 4.0±0.8         | 11±0         | 3.8±0.4                     | 0.3±0.0         | 925**    |
| TFIIB           | Sua7-Halo  | 0.05±0.00                          | 15±1      | 0.59±0.07                          | 51±5      | 2.4±0.2                            | 35±4         | 37,448***     | 0.96±0.25                   | 1.5±0.5         | 8±2          | 4.0±0.5                     | 0.3±0.0         | 4,904*** |
| TFIIF           | Tfg1-Halo  | 0.05±0.00                          | 18±2      |                                    |           | 1.1±0.1                            | 82±2         | 11,584***     | 1.02±0.16                   | 1.4±0.3         | 10±2         | 3.8±0.8                     | 0.3±0.1         | 3,682*** |
| TFIIE           | Tfal-Halo  | 0.04±0.00                          | 19±1      | 0.40±0.08                          | 39±1      | 2.0±0.2                            | 42±1         | 46,172***     | 0.84±0.10                   | 1.8±0.3         | 13±1         | 2.9±0.2                     | 0.4±0.0         | 4,972*** |
| TFIIH           | Ssl2-Halo  |                                    |           | 0.19±0.03                          | 18±1      | 1.3±0.1                            | 82±1         | 28,527***     | 0.59±0.15                   | 3.2±1.6         | 8±1          | 4.9±1.2                     | 0.2±0.1         | 1,299*** |
| TFIIK           | Kin28-Halo |                                    |           | 0.20±0.04                          | 20±0      | 1.4±0.1                            | 80±0         | 20,657**      | 0.63±0.11                   | 2.9±0.9         | 8±3          | 4.8±0.5                     | 0.2±0.0         | 1,946*** |
| <i>rpb1-AA</i>  |            |                                    |           |                                    |           |                                    |              |               |                             |                 |              |                             |                 |          |
| [- RAP]         |            |                                    |           |                                    |           |                                    |              |               |                             |                 |              |                             |                 |          |
| Mediator        | Med14-Halo | 0.07                               | 39        |                                    |           | 0.53                               | 61           | 17,462*       |                             |                 |              |                             |                 |          |
| TFIID           | Taf1-Halo  | 0.07                               | 34        |                                    |           | 0.69                               | 66           | 10,718*       |                             |                 |              |                             |                 |          |
| TBP             | Halo-Spt15 | 0.02                               | 32        | 0.5                                | 35        | 2.9                                | 33           | 20,147*       |                             |                 |              |                             |                 |          |
| TFIIA           | Halo-Toa1  | 0.03                               | 37        | 0.61                               | 27        | 3.4                                | 36           | 17,843*       |                             |                 |              |                             |                 |          |
| TFIIB           | Sua7-Halo  | 0.06                               | 18        | 0.6                                | 46        | 2.5                                | 36           | 17,385*       |                             |                 |              |                             |                 |          |
| TFIIF           | Tfg1-Halo  | 0.05                               | 21        |                                    |           | 1.1                                | 79           | 18,150*       |                             |                 |              |                             |                 |          |
| TFIIE           | Tfal-Halo  | 0.05                               | 24        | 0.46                               | 34        | 2.1                                | 42           | 11,735*       |                             |                 |              |                             |                 |          |
| TFIIH           | Ssl2-Halo  | 0.10                               | 22        |                                    |           | 1.1                                | 78           | 11,924*       |                             |                 |              |                             |                 |          |
| TFIIK           | Kin28-Halo | 0.11                               | 26        |                                    |           | 1.4                                | 74           | 6,319*        |                             |                 |              |                             |                 |          |
| [+ RAP]         |            |                                    |           |                                    |           |                                    |              |               |                             |                 |              |                             |                 |          |
| Mediator        | Med14-Halo | 0.08±0.00                          | 34±0      |                                    |           | 0.57±0.02                          | 66±0         | 34,280***     |                             |                 |              |                             |                 |          |
| TFIID           | Taf1-Halo  | 0.05±0.00                          | 47±1      |                                    |           | 0.57±0.07                          | 53±1         | 28,680***     |                             |                 |              |                             |                 |          |
| TBP             | Halo-Spt15 | 0.03±0.00                          | 37±0      | 0.52±0.05                          | 32±2      | 2.9±0.3                            | 31±3         | 34,339**      |                             |                 |              |                             |                 |          |
| TFIIA           | Halo-Toa1  | 0.03±0.00                          | 46±3      | 0.55±0.01                          | 28±1      | 3.5±0.1                            | 26±4         | 35,439***     |                             |                 |              |                             |                 |          |
| TFIIB           | Sua7-Halo  |                                    |           | 0.42±0.08                          | 17±3      | 2.6±0.3                            | 83±3         | 44,287***     |                             |                 |              |                             |                 |          |
| TFIIF           | Tfg1-Halo  |                                    |           | 0.24±0.04                          | 10±3      | 1.5±0.0                            | 90±3         | 30,982***     |                             |                 |              |                             |                 |          |
| TFIIE           | Tfal-Halo  |                                    |           | 0.20±0.03                          | 9±3       | 1.7±0.2                            | 91±3         | 33,764***     |                             |                 |              |                             |                 |          |
| TFIIH           | Ssl2-Halo  |                                    |           | 0.17±0.04                          | 13±1      | 1.3±0.1                            | 87±1         | 29,132***     |                             |                 |              |                             |                 |          |
| TFIIK           | Kin28-Halo |                                    |           | 0.19±0.03                          | 17±2      | 1.4±0.0                            | 83±2         | 23,172***     |                             |                 |              |                             |                 |          |
| <i>kin28-AA</i> |            |                                    |           |                                    |           |                                    |              |               |                             |                 |              |                             |                 |          |
| [- RAP]         |            |                                    |           |                                    |           |                                    |              |               |                             |                 |              |                             |                 |          |
| Pol II          | Rpb1-Halo  | 0.05                               | 49        |                                    |           | 1.0                                | 51           | 8,680*        |                             |                 |              |                             |                 |          |
| Mediator        | Med14-Halo | 0.05                               | 48        |                                    |           | 0.50                               | 52           | 10,911*       |                             |                 |              |                             |                 |          |
| TFIID           | Taf1-Halo  | 0.06                               | 37        |                                    |           | 0.53                               | 63           | 5,320*        |                             |                 |              |                             |                 |          |
| TBP             | Halo-Spt15 | 0.03                               | 32        | 0.58                               | 35        | 3.1                                | 33           | 14,572*       |                             |                 |              |                             |                 |          |
| TFIIA           | Halo-Toa1  | 0.03                               | 40        | 0.58                               | 27        | 3.5                                | 33           | 6,543*        |                             |                 |              |                             |                 |          |
| TFIIB           | Sua7-Halo  | 0.06                               | 25        | 0.69                               | 51        | 3.3                                | 24           | 5,203*        |                             |                 |              |                             |                 |          |
| TFIIF           | Tfg1-Halo  | 0.05                               | 23        |                                    |           | 1.1                                | 77           | 6,817*        |                             |                 |              |                             |                 |          |
| TFIIE           | Tfal-Halo  | 0.03                               | 40        | 0.29                               | 37        | 1.8                                | 23           | 9,662*        |                             |                 |              |                             |                 |          |
| TFIIH           | Ssl2-Halo  | 0.06                               | 18        |                                    |           | 1.3                                | 82           | 8,807*        |                             |                 |              |                             |                 |          |
| [+ RAP]         |            |                                    |           |                                    |           |                                    |              |               |                             |                 |              |                             |                 |          |
| Pol II          | Rpb1-Halo  | 0.05±0.00                          | 17±1      |                                    |           | 1.0±0.1                            | 83±1         | 35,420***     | 0.38±0.04                   | 10.0±4.1        | 7±2          | 4.0±0.7                     | 0.3±0.1         | 3,028*** |
| Mediator        | Med14-Halo | 0.03±0.00                          | 67±5      |                                    |           | 0.43±0.06                          | 33±5         | 26,376***     | 0.39±0.04                   | 9.1±3.4         | 28±2         | 2.3±0.2                     | 0.5±0.0         | 8,862*** |
| TFIID           | Taf1-Halo  | 0.03±0.00                          | 66±1      |                                    |           | 0.43±0.03                          | 34±1         | 20,698***     | 0.36±0.01                   | 12.5±2.2        | 28±2         | 2.6±0.1                     | 0.4±0.0         | 6,790*** |
| TBP             | Halo-Spt15 | 0.02                               | 52        | 0.36                               | 28        | 2.3                                | 20           | 20,833*       |                             |                 |              |                             |                 |          |
| TFIIA           | Halo-Toa1  | 0.02±0.00                          | 63±4      | 0.46±0.06                          | 20±1      | 3.5±0.3                            | 18±3         | 32,274***     | 0.30±0.03                   | N/A             | 36±3         | 1.7±0.2                     | N/A             | 8,467*** |
| TFIIB           | Sua7-Halo  | 0.03±0.01                          | 34±1      | 0.38±0.14                          | 40±4      | 1.8±0.7                            | 26±4         | 19,952***     | 0.53±0.03                   | 4.0±0.5         | 14±2         | 2.8±0.1                     | 0.4±0.0         | 6,202*** |
| TFIIF           | Tfg1-Halo  | 0.05±0.00                          | 20±3      |                                    |           | 1.1±0.0                            | 80±3         | 25,221***     | 0.46±0.01                   | 5.6±0.4         | 14±1         | 3.2±0.2                     | 0.3±0.0         | 3,482*** |
| TFIIE           | Tfal-Halo  | 0.02±0.00                          | 39±1      | 0.30±0.07                          | 26±2      | 1.8±0.1                            | 35±1         | 35,985***     | 0.39±0.04                   | 9.1±3.4         | 31±3         | 2.4±0.2                     | 0.5±0.0         | 6,734*** |
| TFIIH           | Ssl2-Halo  | 0.06±0.00                          | 18±2      |                                    |           | 1.1±0.0                            | 82±2         | 28,668***     | 0.45±0.05                   | 5.9±1.8         | 17±3         | 3.3±0.7                     | 0.3±0.1         | 3,288*** |
| <i>sth1-AA</i>  |            |                                    |           |                                    |           |                                    |              |               |                             |                 |              |                             |                 |          |
| [- RAP]         |            |                                    |           |                                    |           |                                    |              |               |                             |                 |              |                             |                 |          |
| Pol II          | Rpb1-Halo  | 0.04±0.00                          | 51±1      |                                    |           | 1.1±0.0                            | 49±1         | 39,142***     |                             |                 |              |                             |                 |          |

|          |            |           |      |           |      |           |      |           |           |         |      |         |         |          |
|----------|------------|-----------|------|-----------|------|-----------|------|-----------|-----------|---------|------|---------|---------|----------|
| Mediator | Med14-Halo | 0.06±0.01 | 42±2 |           |      | 0.64±0.05 | 58±2 | 30,048*** |           |         |      |         |         |          |
| TFIID    | Taf1-Halo  | 0.06±0.00 | 36±2 |           |      | 0.72±0.03 | 64±2 | 37,412*** |           |         |      |         |         |          |
| TBP      | Halo-Spt15 | 0.03±0.01 | 32±3 | 0.48±0.06 | 33±1 | 3.0±0.2   | 35±2 | 52,492*** |           |         |      |         |         |          |
| TFIIA    | Halo-Toa1  | 0.03±0.00 | 39±1 | 0.53±0.01 | 26±0 | 3.3±0.0   | 35±0 | 29,865*** |           |         |      |         |         |          |
| TFIIB    | Sua7-Halo  | 0.05±0.01 | 23±3 | 0.60±0.09 | 47±4 | 2.7±0.4   | 30±5 | 42,644*** |           |         |      |         |         |          |
| TFIIF    | Tfg1-Halo  | 0.05±0.00 | 27±1 |           |      | 1.1±0.1   | 73±1 | 35,430*** |           |         |      |         |         |          |
| TFIIE    | Tfa1-Halo  | 0.03±0.01 | 32±3 | 0.36±0.03 | 34±2 | 2.0±0.0   | 34±4 | 32,023*** |           |         |      |         |         |          |
| TFIIH    | Ssl2-Halo  | 0.07±0.01 | 24±2 |           |      | 1.3±0.1   | 76±2 | 35,257*** |           |         |      |         |         |          |
| TFIIK    | Kin28-Halo | 0.04±0.00 | 44±5 |           |      | 1.3±0.1   | 56±5 | 25,743*** |           |         |      |         |         |          |
| [+ RAP]  |            |           |      |           |      |           |      |           |           |         |      |         |         |          |
| Pol II   | Rpb1-Halo  | 0.09±0.00 | 24±2 |           |      | 1.4±0.0   | 76±2 | 42,913*** |           |         |      |         |         |          |
| Mediator | Med14-Halo | 0.07±0.01 | 35±1 |           |      | 0.71±0.02 | 65±1 | 27,978*** | 0.57±0.09 | 3.4±1.1 | 9±1  | 3.3±0.2 | 0.3±0.0 | 4,949*** |
| TFIID    | Taf1-Halo  | 0.04±0.01 | 54±3 |           |      | 0.80±0.00 | 46±3 | 34,683*** | 0.58±0.09 | 3.3±1.0 | 20±2 | 2.5±0.3 | 0.5±0.1 | 6,257*** |
| TBP      | Halo-Spt15 | 0.03±0.01 | 26±6 | 0.56±0.05 | 28±1 | 3.1±0.1   | 46±7 | 55,291*** |           |         |      |         |         |          |
| TFIIA    | Halo-Toa1  | 0.04±0.00 | 24±1 | 0.65±0.04 | 28±1 | 3.2±0.1   | 48±2 | 36,911*** | 0.43±0.04 | 6.7±1.8 | 24±2 | 2.5±0.3 | 0.5±0.1 | 4,074*** |
| TFIIB    | Sua7-Halo  | 0.06±0.02 | 15±2 | 0.69±0.01 | 46±3 | 2.5±0.0   | 39±5 | 39,866*** | 0.87±0.20 | 1.7±0.6 | 16±1 | 3.8±1.1 | 0.3±0.1 | 2,803*** |
| TFIIF    | Tfg1-Halo  | 0.05±0.00 | 21±1 |           |      | 1.2±0.1   | 79±1 | 49,110*** | 0.88±0.14 | 1.7±0.4 | 21±9 | 3.6±0.2 | 0.3±0.0 | 4,192*** |
| TFIIE    | Tfa1-Halo  | 0.03±0.02 | 18±3 | 0.36±0.03 | 29±1 | 2.0±0.0   | 53±4 | 36,245*** | 0.72±0.04 | 2.3±0.2 | 20±4 | 3.5±0.5 | 0.3±0.0 | 5,031*** |
| TFIIH    | Ssl2-Halo  | 0.10±0.01 | 16±2 |           |      | 1.5±0.1   | 84±2 | 38,065*** | 0.55±0.04 | 3.7±0.6 | 32±3 | 3.0±0.6 | 0.4±0.1 | 1,612*** |
| TFIIK    | Kin28-Halo | 0.07±0.00 | 31±3 |           |      | 1.5±0.1   | 69±3 | 22,987*** | 0.67±0.01 | 2.6±0.1 | 39±0 | 4.7±0.1 | 0.2±0.0 | 2,660*** |

**Table S2. Fast- and slow-tracking results for PIC components in AA strains. Related to Figures 2, 4 and 6.** Fast- and slow-tracking, when applicable, results from AA experiments, outlined as in Table S1. For *tbp*-AA, *rpb1*-AA and *kin28*-AA, fast-tracking data were collected for one biological replicate under [-RAP] conditions to verify similar dynamics compared to wildtype. For *tbp*-AA, *kin28*-AA and *sth1*-AA, slow-tracking data were collected for one biological replicate under [-RAP] conditions and corresponding 1-CDF curves shown in Figures S4H, S5C and S6E, respectively. Curves were not fitted.

| PIC comp.                | Subunit | ID            | GENOTYPE                                                                                                   |
|--------------------------|---------|---------------|------------------------------------------------------------------------------------------------------------|
| <b>WILDTYPE</b>          |         |               |                                                                                                            |
|                          |         | <b>NBY061</b> | <b>MATa leu2-3,112 trp1-1 can1-100 ura3-1 ade2-1 his3-11,15 [phi+] Δpdr5::LEU2</b>                         |
| Pol II                   | Rpb1    | NBY259        | RPB1-HALO::kanMX6                                                                                          |
| Mediator                 | Med14   | NBY229        | MED14-HALO::NatMX                                                                                          |
| TFIID                    | Taf1    | NBY150        | TAF1-HALO::NatMX                                                                                           |
| TBP                      | Spt15   | NBY212        | HALO-SPT15                                                                                                 |
| TFIIA                    | Toa1    | NBY280        | HALO-TOA1                                                                                                  |
| TFIIB                    | Sua7    | NBY079        | SUA7-HALO::NatMX                                                                                           |
| TFIIF                    | Tfg1    | NBY154        | TFG1-HALO::NatMX                                                                                           |
| TFIIE                    | Tfa1    | NBY152        | TFAI-HALO::NatMX                                                                                           |
| TFIIH                    | Ssl2    | NBY081        | SSL2-HALO::NatMX                                                                                           |
| TFIIK                    | Kin28   | NBY156        | KIN28-HALO::NatMX                                                                                          |
| <i>thp-ΔA</i>            |         |               |                                                                                                            |
| <b>TBP Anchor-Away</b>   |         | <b>MBY902</b> | <b>MATa tor1-1 fpr1::loxP-LEU2-loxP RPL13A-2xFKBP12::loxP pdr5::loxP FRB-GFP-SPT15</b>                     |
| Pol II                   | Rpb1    | NBY332        | RPB1-HALO::NatMX                                                                                           |
| Mediator                 | Med14   | NBY339        | MED14-HALO::NatMX                                                                                          |
| TFIID                    | Taf1    | NBY334        | TAF1-HALO::NatMX                                                                                           |
| TFIIA                    | Toa1    | NBY346        | HALO-TOA1                                                                                                  |
| TFIIB                    | Sua7    | NBY342        | SUA7-HALO::NatMX                                                                                           |
| TFIIF                    | Tfg1    | NBY433        | TFG1-HALO::NatMX                                                                                           |
| TFIIE                    | Tfa1    | NBY344        | TFAI-HALO::NatMX                                                                                           |
| TFIIH                    | Ssl2    | LBY028        | SSL2-HALO::NatMX                                                                                           |
| TFIIK                    | Kin28   | LBY025        | KIN28-HALO::NatMX                                                                                          |
| <i>med14-ΔA</i>          |         |               |                                                                                                            |
| <b>Med14 Anchor-Away</b> |         | <b>NBY439</b> | <b>MATa tor1-1 fpr1::loxP-LEU2-loxP RPL13A-2xFKBP12::loxP pdr5::loxP MED14-FRBGFP-KanMX</b>                |
| Pol II                   | Rpb1    | NBY445        | RPB1-HALO::NatMX                                                                                           |
| TFIID                    | Taf1    | NBY459        | TAF1-HALO::NatMX                                                                                           |
| TBP                      | Spt15   | NBY483        | HALO-SPT15                                                                                                 |
| TFIIA                    | Toa1    | NBY489        | MATa tor1-1 fpr1::loxP-LEU2-loxP RPL13A-2xFKBP12::loxP pdr5::loxP KIN28-NatMX MED14 FRBGFP KanMX HALO TOA1 |
| TFIIB                    | Sua7    | NBY472        | SUA7-HALO::NatMX                                                                                           |
| TFIIF                    | Tfg1    | NBY473        | TFG1-HALO::NatMX                                                                                           |
| TFIIE                    | Tfa1    | NBY476        | TFAI-HALO::NatMX                                                                                           |
| TFIIH                    | Ssl2    | NBY496        | SSL2-HALO::NatMX                                                                                           |
| TFIIK                    | Kin28   | NBY497        | KIN28-HALO::NatMX                                                                                          |
| <i>taf1-ΔA</i>           |         |               |                                                                                                            |
| <b>Taf1 Anchor-Away</b>  |         | <b>NBY349</b> | <b>MATa tor1-1 fpr1::loxP-LEU2-loxP RPL13A-2xFKBP12::loxP pdr5::loxP TAF1-FRBGFP-KanMX</b>                 |
| Pol II                   | Rpb1    | NBY359        | RPB1-HALO::NatMX                                                                                           |
| Mediator                 | Med14   | NBY363        | MED14-HALO::NatMX                                                                                          |
| TBP                      | Spt15   | NBY353        | HALO-SPT15                                                                                                 |
| TFIIA                    | Toa1    | NBY487        | MATa tor1-1 fpr1::loxP-LEU2-loxP RPL13A-2xFKBP12::loxP pdr5::loxP KIN28-NatMX TAF1 FRBGFP KanMX HALO TOA1  |
| TFIIB                    | Sua7    | NBY357        | SUA7-HALO::NatMX                                                                                           |
| TFIIF                    | Tfg1    | NBY494        | TFG1-HALO::NatMX                                                                                           |
| TFIIE                    | Tfa1    | LBY040        | TFAI-HALO::NatMX                                                                                           |
| TFIIH                    | Ssl2    | NBY361        | SSL2-HALO::NatMX                                                                                           |
| TFIIK                    | Kin28   | LBY038        | KIN28-HALO::NatMX                                                                                          |
| <i>rpb1-ΔA</i>           |         |               |                                                                                                            |
| <b>Rpb1 Anchor-Away</b>  |         | <b>YAR270</b> | <b>MATa tor1-1 fpr1::loxP-LEU2-loxP RPL13A-2xFKBP12::loxP pdr5::loxP RPB1-FRB-GFP::kanMX6</b>              |
| Pol II                   | Rpb9    | NBY169        | RPB9-HALO::NatMX                                                                                           |
| Mediator                 | Med14   | NBY202        | MED14-HALO::NatMX                                                                                          |
| TFIID                    | Taf1    | NBY188        | TAF1-HALO::NatMX                                                                                           |
| TBP                      | Spt15   | NBY262        | HALO-SPT15                                                                                                 |
| TFIIA                    | Toa1    | NBY298        | HALO-TOA1                                                                                                  |
| TFIIB                    | Sua7    | NBY195        | SUA7-HALO::NatMX                                                                                           |
| TFIIF                    | Tfg1    | NBY198        | TFG1-HALO::NatMX                                                                                           |
| TFIIE                    | Tfa1    | NBY193        | TFAI-HALO::NatMX                                                                                           |
| TFIIH                    | Ssl2    | NBY173        | SSL2-HALO::NatMX                                                                                           |
| TFIIK                    | Kin28   | NBY199        | KIN28-HALO::NatMX                                                                                          |
| <i>kin28-ΔA</i>          |         |               |                                                                                                            |
| <b>Kin28 Anchor-Away</b> |         | <b>NBY216</b> | <b>MATa tor1-1 fpr1::loxP-LEU2-loxP RPL13A-2xFKBP12::loxP pdr5::loxP KIN28-FRB-GFP::kanMX6</b>             |
| Pol II                   | Rpb1    | NBY323        | RPB1-HALO::NatMX                                                                                           |
| Mediator                 | Med14   | NBY250        | MED14-HALO::NatMX                                                                                          |
| TFIID                    | Taf1    | NBY144        | TAF1-HALO::NatMX                                                                                           |
| TBP                      | Spt15   | NBY265        | HALO-SPT15                                                                                                 |
| TFIIA                    | Toa1    | NBY302        | HALO-TOA1                                                                                                  |
| TFIIB                    | Sua7    | NBY312        | SUA7-HALO::NatMX                                                                                           |
| TFIIF                    | Tfg1    | NBY149        | TFG1-HALO::NatMX                                                                                           |
| TFIIE                    | Tfa1    | NBY314        | TFAI-HALO::NatMX                                                                                           |
| TFIIH                    | Ssl2    | NBY128        | SSL2-HALO::NatMX                                                                                           |
| <i>sth1-ΔA</i>           |         |               |                                                                                                            |
| <b>Sth1 Anchor-Away</b>  |         | <b>YAR245</b> | <b>MATa tor1-1 fpr1::loxP-LEU2-loxP RPL13A-2xFKBP12::loxP pdr5::loxP STH1-FRB-GFP::kanMX6</b>              |
| Pol II                   | Rpb1    | NBY325        | RPB1-HALO::NatMX                                                                                           |
| Mediator                 | Med14   | NBY209        | MED14-HALO::NatMX                                                                                          |
| TFIID                    | Taf1    | NBY116        | TAF1-HALO::NatMX                                                                                           |
|                          | Taf2    | NBY205        | TAF2-HALO::NatMX                                                                                           |
| TBP                      | Spt15   | NBY268        | HALO-SPT15                                                                                                 |
| TFIIA                    | Toa1    | NBY308        | HALO-TOA1                                                                                                  |
| TFIIB                    | Sua7    | NBY320        | SUA7-HALO::NatMX                                                                                           |
| TFIIF                    | Tfg1    | NBY208        | TFG1-HALO::NatMX                                                                                           |
| TFIIE                    | Tfa1    | NBY118        | TFAI-HALO::NatMX                                                                                           |
| TFIIH                    | Ssl2    | NBY114        | SSL2-HALO::NatMX                                                                                           |
| TFIIK                    | Kin28   | NBY122        | KIN28-HALO::NatMX                                                                                          |

Table S3, related to Key Resources Table. *S. cerevisiae* strains used in this study.
